# Supplementary material for: Putting the pieces together: A qualitative study exploring perspectives on self-management and exercise behavior among people living with multimorbidity, healthcare professionals, relatives, and patient advocates
Source: PubMed Central journal article supplement — J Multimorb Comorb. 2022 May 20;12:26335565221100172. doi: 10.1177/26335565221100172 (PMC9125109; doi:10.1177/26335565221100172), 2022-05-20

# LEVER DU MED FLERE KRONISKE SYGDOMME eller er du pårørende til en, der gør?

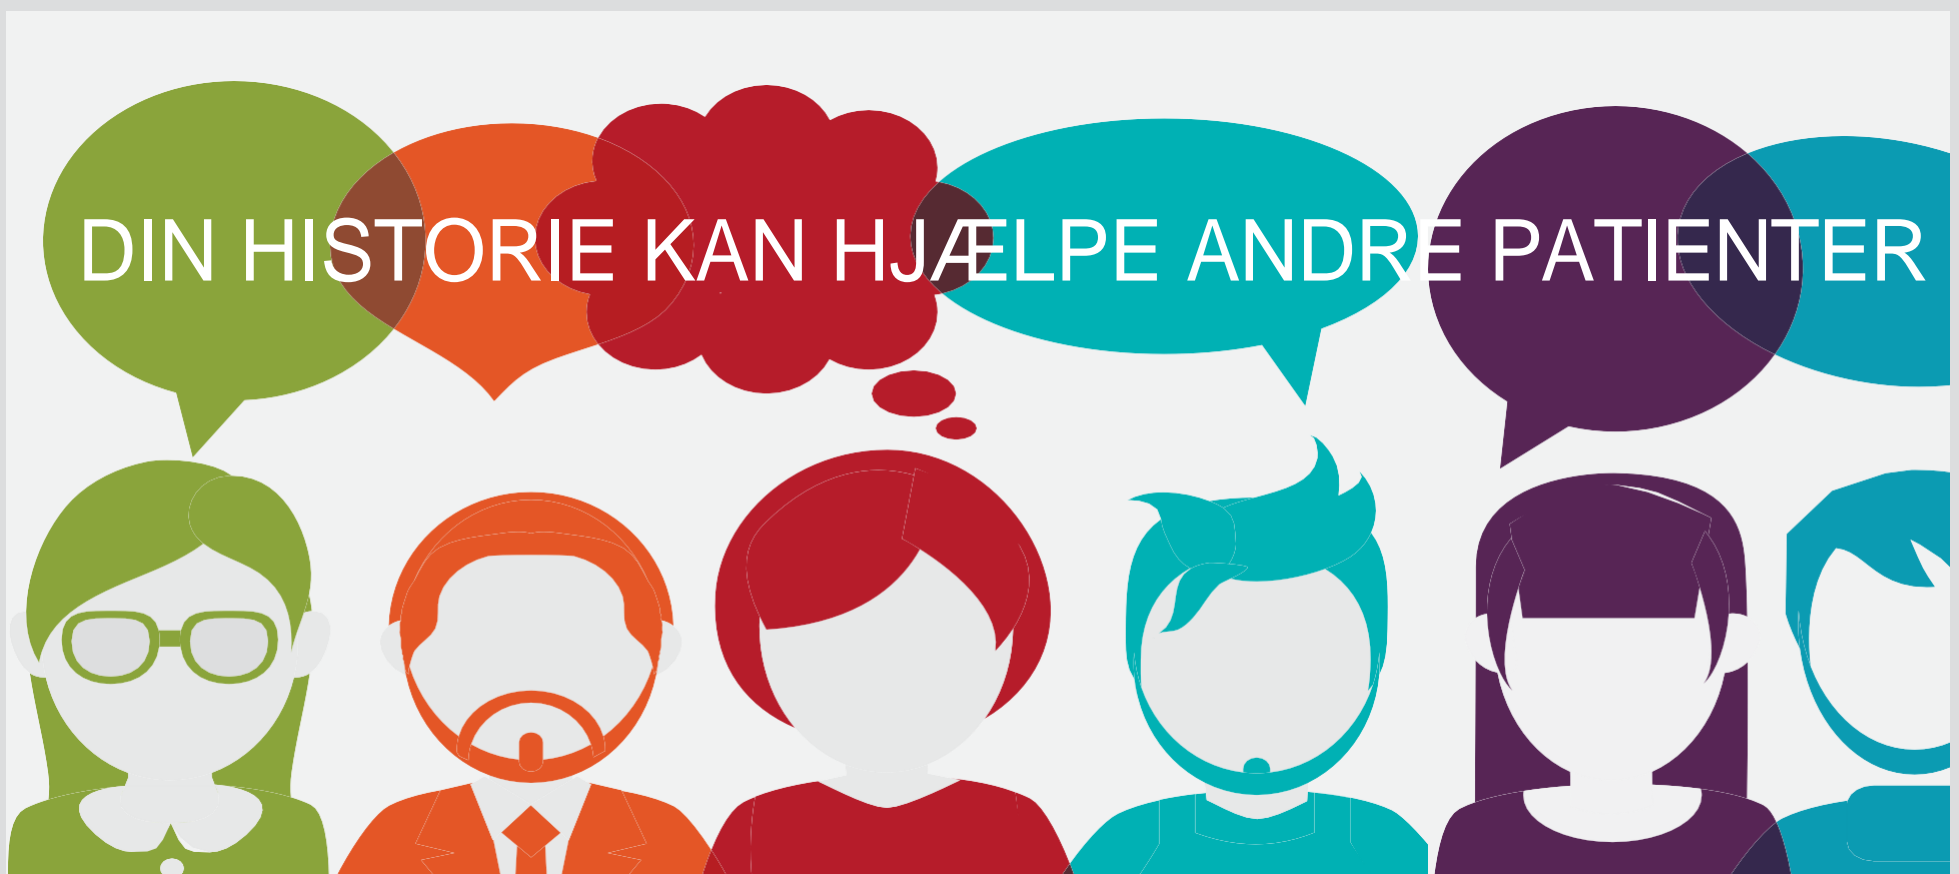

## STUDIET / UNDERSØGELSEN

Region Sjælland og Syddansk Universitet er i gang med projektet 'Fokusgruppeundersøgelse af behov, oplevelser og præferencer hos folk, som lever med flere kroniske sygdomme samt omsorgsgivere og sundhedsprofessionelle', hvor vi undersøger multisyges behov, oplevelser og præferencer samt andres perspektiv på multisygdom.

## TID OG STED

Interviewene finder sted på Slagelse Sygehus, Næstved Sygehus, Psykiatrihospitalet i Slagelse eller i Roskilde og Lolland Kommuner, afhængig af hvor du er tilknyttet. **Interviewene vil foregå fra d. xx. Xxx til d. xx. Xxxx i tidsrummet kl. xx:xx-xx:xx.**

## HVEM KAN DELTAGE?

Du kan deltage i fokusgruppeinterview, hvis du har eller er pårørende til en, der har mindst to af nedenstående sygdomme:

- Artrose (slidgigt) i knæ eller hofte
- Hjertesvigt eller iskæmisk hjertesygdom
- Forhøjet blodtryk
- Type-2-diabetes
- Kronisk Obstruktiv Lungesygdom (KOL)
- Depression

## ER DU INTERESSERET I AT DELTAGE?

eller har du spørgsmål, kontakt venligst:

Mathias Lindhardt, studentermedhjælper

Mail: Malin16@student.sdu.dk

Telefon: 6047 1519 mandag – onsdag kl. 9.00-15.00

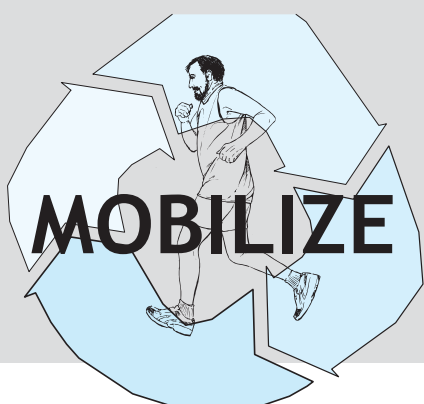

*MOBILIZE-projektet er finansieret af the European Research Council (ERC) gennem EU's Horizon 2020 forskning- og innovationsprogram (grant agreement No801790)*

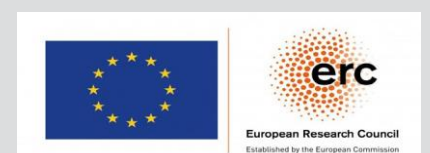

Supplement: sj-pdf-2-cob-10.1177_26335565221100172.pdf [file sj-pdf-2-cob-10.1177_26335565221100172.pdf]
