# Supplementary material for: Putting the pieces together: A qualitative study exploring perspectives on self-management and exercise behavior among people living with multimorbidity, healthcare professionals, relatives, and patient advocates
Source: PubMed Central journal article supplement — J Multimorb Comorb. 2022 May 20;12:26335565221100172. doi: 10.1177/26335565221100172 (PMC9125109; doi:10.1177/26335565221100172), 2022-05-20
Supplement: sj-pdf-5-cob-10.1177_26335565221100172.pdf [file sj-pdf-5-cob-10.1177_26335565221100172.pdf]

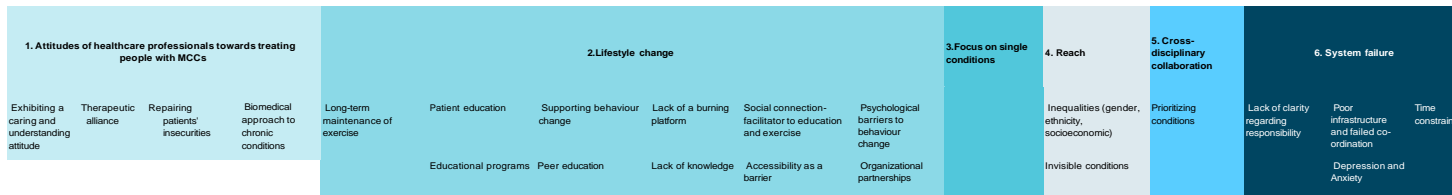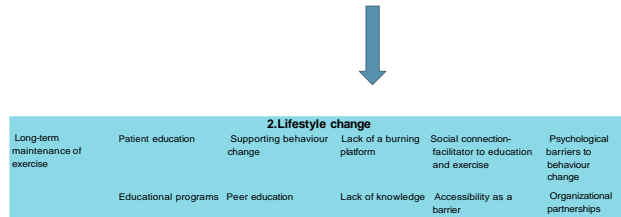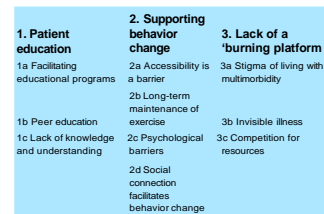

**Four perspectives on exercise behavior change (COM-B profile)**

|                                               | CAPABILITY                                                                                                               | OPPORTUNITY                                                                                             | MOTIVATION                                                                                                        |
|-----------------------------------------------|--------------------------------------------------------------------------------------------------------------------------|---------------------------------------------------------------------------------------------------------|-------------------------------------------------------------------------------------------------------------------|
| <b>People living with multiple conditions</b> | Pain, Breathlessness, Fatigue, Lack of energy                                                                            | Financial hardship, Lack of access to free training, Transport and proximity, Weather, Time constraints | Worries about condition worsening, Fear of falling, Extrinsic motivation, Incorporating exercise in daily routine |
| <b>Healthcare professionals</b>               | Patient barriers to exercise: Pain, Mental illness, Knowledge of the conditions, Beliefs about exercise, Breaking habits | Financial barriers, Community and social support, Accessibility, Maintenance of exercise                | Support for patients who lack self-confidence, Motivating patients to be physically active                        |
| <b>Relatives and partners</b>                 | Lack of knowledge about their role, Taking over responsibility, attitudes towards partner's limitations                  | Weather, Proximity to training facilities, Exercising alongside partner, Group exercise                 | Motivator role                                                                                                    |
| <b>Patient advocates</b>                      | Providing patient education and leadership training, Supporting patients to navigate the system                          | Facilitating social support and access, Need for establishing collaborations, Competing for resources   | Lack of urgency                                                                                                   |
